# Supplementary material for: Self-assembly and structures of nanoscale double emulsion droplets through coarse-grained molecular dynamics simulations
Source: Royal Society of Chemistry journal article supplement (doi:10.1039/d3sm00656e), 2023-01-01
Supplement: d3sm00656e1.pdf [file d3sm00656e1.pdf]

## Supporting Information

### **Self-assembly and Structures of Nanoscale Double Emulsion Droplets by Coarse-grained Molecular Dynamics Simulations**

Qiubo Chen and Jianwei Zheng\*

Institute of High Performance Computing (IHPC), Agency for Science, Technology and Research  
(A\*STAR), 1 Fusionopolis Way, #16-16 Connexis, Singapore 138632, Republic of Singapore

\* Corresponding author. E-mail: [zhengjw@ihpc.a-star.edu.sg](mailto:zhengjw@ihpc.a-star.edu.sg).

Tel: +65 6419 1567. Fax: +65 6463 2536

# 1 Coarse-grained Model

## 1.1 Bonded interactions of *n*-heptane and C12E4

***n*-heptane.** In the CG *n*-heptane molecule, there is only one bond type (i.e., C2E-C3) and one angle type (i.e., C2E-C3-C2E). For the bond interaction, three Gaussians are applied. For the angle interaction, four Gaussians are applied. The parameters are given in Table S1.

**Table S1.** Parameters of multi-centred Gaussians for the potentials of bond stretching and angle bending in the CG *n*-heptane model. Both  $r_{c,i}^{CG}$  and  $\omega_{r,i}^{CG}$  have the unit of nm. Both  $\theta_{c,i}^{CG}$  and  $\omega_{\theta,i}^{CG}$  have the unit of degree.

| Bond   | $G_1$          |                     |                | $G_2$          |                     |                | $G_3$          |                     |                |
|--------|----------------|---------------------|----------------|----------------|---------------------|----------------|----------------|---------------------|----------------|
|        | $r_{c,1}^{CG}$ | $\omega_{r,1}^{CG}$ | $A_{r,1}^{CG}$ | $r_{c,2}^{CG}$ | $\omega_{r,2}^{CG}$ | $A_{r,2}^{CG}$ | $r_{c,3}^{CG}$ | $\omega_{r,3}^{CG}$ | $A_{r,3}^{CG}$ |
| C2E-C3 | 0.2682         | 0.0181              | 0.0620         | 0.3001         | 0.0130              | 0.4797         | 0.3264         | 0.0105              | 0.5189         |

  

| Angle      | $G_1$               |                          |                     | $G_2$               |                          |                     | $G_3$               |                          |                     | $G_4$               |                          |                     |
|------------|---------------------|--------------------------|---------------------|---------------------|--------------------------|---------------------|---------------------|--------------------------|---------------------|---------------------|--------------------------|---------------------|
|            | $\theta_{c,1}^{CG}$ | $\omega_{\theta,1}^{CG}$ | $A_{\theta,1}^{CG}$ | $\theta_{c,2}^{CG}$ | $\omega_{\theta,2}^{CG}$ | $A_{\theta,2}^{CG}$ | $\theta_{c,3}^{CG}$ | $\omega_{\theta,3}^{CG}$ | $A_{\theta,3}^{CG}$ | $\theta_{c,4}^{CG}$ | $\omega_{\theta,4}^{CG}$ | $A_{\theta,4}^{CG}$ |
| C2E-C3-C2E | 139.13              | 32.06                    | 0.4230              | 139.13              | 8.57                     | 0.1356              | 155.88              | 11.75                    | 0.2786              | 173.51              | 8.95                     | 0.5621              |

**C12E4.** In the CG C12E4 molecule, there are five bond types (i.e., C3E-C3, C3-C3, C3-EO, EO-EO, and EO-EG) and six angle types (i.e., C3E-C3-C3, C3-C3-C3, C3-C3-EO, C3-EO-EO, EO-EO-EO, and EO-EO-EG). Similarly, three Gaussians and four Gaussians are applied to represent the bond and angle potentials, respectively. The parameters of CG bonds and angles for C12E4 are given in Table S2 and Table S3.

**Table S2.** Parameters of multi-centred Gaussians for the bond stretching potentials in the CG C12E4 model. Both  $r_{c,i}^{CG}$  and  $\omega_{r,i}^{CG}$  have the unit of nm.

| Bond   | $G_1$          |                     |                | $G_2$          |                     |                | $G_3$          |                     |                |
|--------|----------------|---------------------|----------------|----------------|---------------------|----------------|----------------|---------------------|----------------|
|        | $r_{c,1}^{CG}$ | $\omega_{r,1}^{CG}$ | $A_{r,1}^{CG}$ | $r_{c,2}^{CG}$ | $\omega_{r,2}^{CG}$ | $A_{r,2}^{CG}$ | $r_{c,3}^{CG}$ | $\omega_{r,3}^{CG}$ | $A_{r,3}^{CG}$ |
| C3E-C3 | 0.3322         | 0.0249              | 0.0732         | 0.3563         | 0.0135              | 0.4028         | 0.3846         | 0.0104              | 0.6676         |
| C3-C3  | 0.3291         | 0.0242              | 0.0687         | 0.3527         | 0.0135              | 0.3877         | 0.3805         | 0.0106              | 0.6880         |
| C3-EO  | 0.2870         | 0.0198              | 0.0201         | 0.3323         | 0.0353              | 0.6570         | 0.3607         | 0.0202              | 0.6136         |
| EO-EO  | 0.3179         | 0.0317              | 0.1754         | 0.3491         | 0.0256              | 0.7903         | 0.3653         | 0.0105              | 0.2178         |
| EO-EG  | 0.3877         | 0.0505              | 0.3314         | 0.4060         | 0.0214              | 0.5072         | 0.4307         | 0.0127              | 0.4192         |

**Table S3.** Parameters of multi-centred Gaussians for the angle bending potentials in the CG C12E4 model. Both  $\theta_{c,i}^{CG}$  and  $\omega_{\theta,i}^{CG}$  have the unit of degree.

| Angle     | $G_1$               |                          |                     | $G_2$               |                          |                     | $G_3$               |                          |                     | $G_4$               |                          |                     |
|-----------|---------------------|--------------------------|---------------------|---------------------|--------------------------|---------------------|---------------------|--------------------------|---------------------|---------------------|--------------------------|---------------------|
|           | $\theta_{c,1}^{CG}$ | $\omega_{\theta,1}^{CG}$ | $A_{\theta,1}^{CG}$ | $\theta_{c,2}^{CG}$ | $\omega_{\theta,2}^{CG}$ | $A_{\theta,2}^{CG}$ | $\theta_{c,3}^{CG}$ | $\omega_{\theta,3}^{CG}$ | $A_{\theta,3}^{CG}$ | $\theta_{c,4}^{CG}$ | $\omega_{\theta,4}^{CG}$ | $A_{\theta,4}^{CG}$ |
| C3E-C3-C3 | 127.60              | 28.60                    | 0.1224              | 140.11              | 18.25                    | 0.3312              | 151.09              | 9.01                     | 0.1218              | 172.43              | 16.15                    | 0.8489              |
| C3-C3-C3  | 126.84              | 29.65                    | 0.1276              | 139.82              | 18.05                    | 0.3252              | 151.00              | 9.02                     | 0.1211              | 172.61              | 16.61                    | 0.8057              |
| C3-C3-EO  | 97.73               | 22.17                    | 0.0895              | 125.92              | 21.54                    | 0.4036              | 152.23              | 25.49                    | 0.5336              | 250.82              | 45.46                    | 98.04               |
| C3-EO-EO  | 97.66               | 20.86                    | 0.1311              | 127.82              | 30.57                    | 0.2577              | 166.18              | 41.84                    | 0.9839              | 176.10              | 7.03                     | 0.0189              |
| EO-EO-EO  | 101.10              | 22.18                    | 0.1446              | 131.90              | 39.48                    | 0.3754              | 158.71              | 36.50                    | 0.6402              | 175.12              | 7.05                     | 0.0318              |
| EO-EO-EG  | 93.54               | 23.62                    | 0.1453              | 119.19              | 21.53                    | 0.1035              | 156.31              | 43.86                    | 0.9957              | 174.69              | 7.22                     | 0.0305              |

## 1.2 Non-bonded interactions

The CG beads in present models are principally classified as hydrophilic or hydrophobic beads. The hydrophilic beads include W3, EO, and EG, and the hydrophobic beads include C3, C2E and C3E. Table S4 lists the parameters of pairwise non-bonded interactions described by 12-6 LJ potential form.

**Table S4.** Parameters of CG non-bonded interaction potentials.

| Bead $i$  | Bead $j$  | $\sigma_{ij}$ (nm) | $\epsilon_{ij}$ (kJ/mol) |
|-----------|-----------|--------------------|--------------------------|
| W3        | W3        | 0.4305             | 4.47                     |
| W3        | EO        | 0.4380             | 4.75                     |
| W3        | EG        | 0.4360             | 5.80                     |
| EO        | EO        | 0.4120             | 2.86                     |
| EO        | EG        | 0.4160             | 3.85                     |
| EG        | EG        | 0.4400             | 6.60                     |
| C3 or C3E | C3 or C3E | 0.4660             | 2.67                     |
| C3 or C3E | C2E       | 0.4490             | 2.18                     |
| C2E       | C2E       | 0.4320             | 1.78                     |
| W3        | C3 or C3E | 0.4487             | 2.15                     |
| W3        | C2E       | 0.4315             | 1.43                     |
| EO        | C3 or C3E | 0.4710             | 2.14                     |
| EO        | C2E       | 0.4520             | 1.71                     |
| EG        | C3 or C3E | 0.4600             | 4.30                     |
| EG        | C2E       | 0.4385             | 3.65                     |

### 1.3 Validations

As part of the validations for our coarse-grained models, Table S5 lists the density and viscosity of various systems from MD simulations and experiment. Note that the temperature is 298.15 K, and the pressure is 1 bar.

**Table S5.** Density and viscosity from CG MD simulation and experiment.

| System                | Density (kg/m <sup>3</sup> ) |        | Viscosity (cP) |       |
|-----------------------|------------------------------|--------|----------------|-------|
|                       | CG MD                        | Expt.  | CG MD          | Expt. |
| water                 | 997.08                       | 997.05 | 0.890          | 0.892 |
| <i>n</i> -hexane      | 654.9                        | 654.8  | 0.30           | 0.296 |
| <i>n</i> -heptane     | 679.5                        | 679.6  | 0.39           | 0.388 |
| <i>n</i> -nonane      | 713.9                        | 714.1  | 0.65           | 0.654 |
| <i>n</i> -dodecane    | 745.5                        | 745.7  | 1.33           | 1.359 |
| <i>n</i> -pentadecane | 768.8                        | 769.0  | 2.62           | 2.576 |
| 1-ethoxyethane        | 707.9                        | 708    | 0.22           | 0.222 |
| 1-ethoxypropane       | 724.3                        | 724    | 0.31           | 0.306 |
| 2-ethoxyethanol       | 908.1                        | 907    | 2.69           | 2.7   |
| 2-propoxyethanol      | 883.5                        | 883    | 1.84           | 1.867 |
| PEG-4                 | 1121.6                       | 1122   | 41.2           | 41.1  |
| PEG-2/water = 0.2     |                              |        | 1.82           | 1.9   |
| PEG-4/water = 0.2     |                              |        | 2.12           | 2.1   |

## 2 Snapshots

Figure S1 shows the snapshots of the initial simulation box with  $v_{w/s} = 1.0/1.0$ .

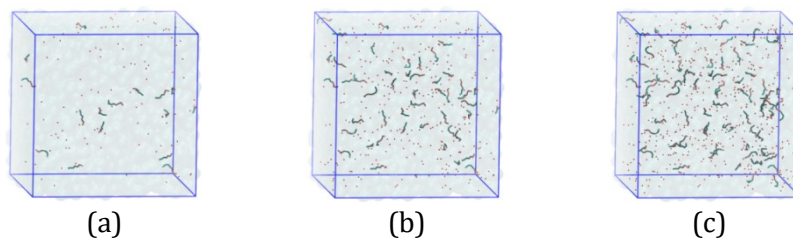

**Figure S1.** Initial conformation of the ternary mixtures with  $v_{w/s} = 1.0/1.0$  and (a) 1% water; (b) 3% water; (c) 5% water. The temporary box size is 20 nm, and the compositions is determined by the pre-set volume of (10 nm)<sup>3</sup>.

Figure S2 shows the snapshots of three emulsion systems in batch 1 and batch 2 before continuing the simulations for long-time equilibration. In batch 1, many small or big droplets can be observed. With the increase of water volume fraction, these droplet intermediates are bigger. In batch 2, the simulation box is a product of  $3 \times 3 \times 3$  of the  $(10 \text{ nm})^3$  boxes, in each of which there is only one small droplet.

However, at this stage, all the droplets take the configuration of simple water-in-oil type. It means that, double emulsion droplets do not immediately form after the mixing of three components. When the mixtures were in the process of being equilibrated, simple emulsion droplets firstly formed. Double emulsion droplets are the further product of self-reorganization of small simple emulsion droplets which were merely the intermediates.

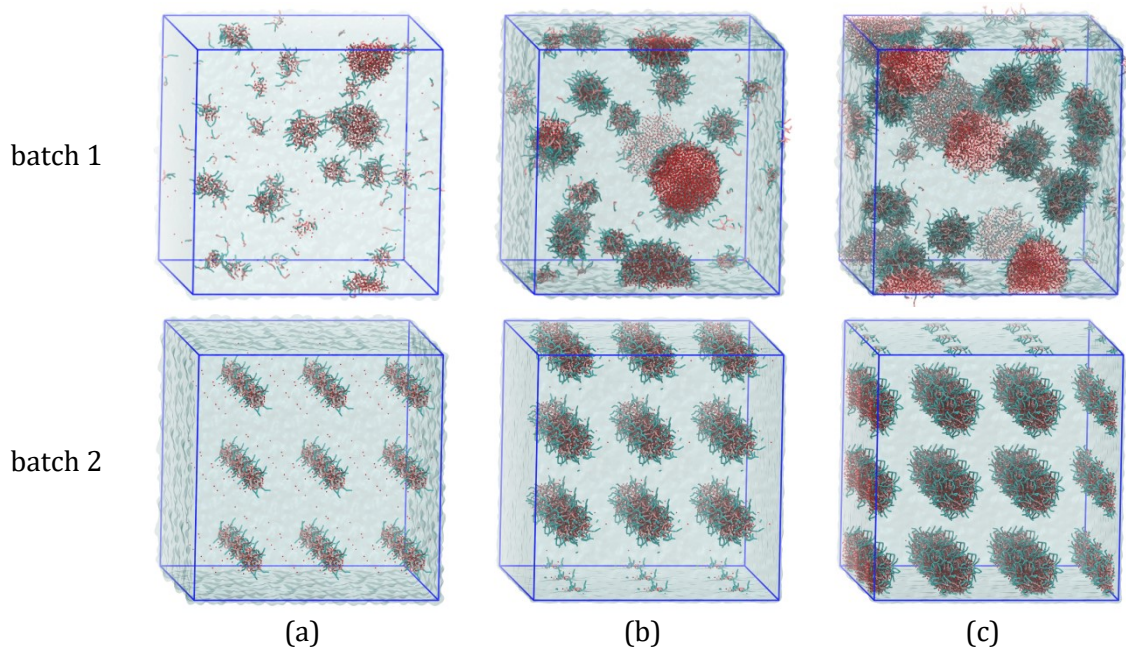

**Figure S2.** Conformation of the ternary mixtures at the beginning of the long-time equilibration (time =  $0 \mu\text{s}$ ) in batch 1 (top) and batch 2 (bottom) with  $v_{w/s} = 1.0/1.0$  and (a) 1% water; (b) 3% water; (c) 5% water. The box size in the figures is  $\sim 30 \text{ nm}$ .

### 3 Radial Distribution Function

Figure S3 and Figure S4 plot the profiles of the radial distribution function (RDF) among the hydrophilic beads and waters for the emulsion systems in batch 1 with 3% and 5% water, respectively.

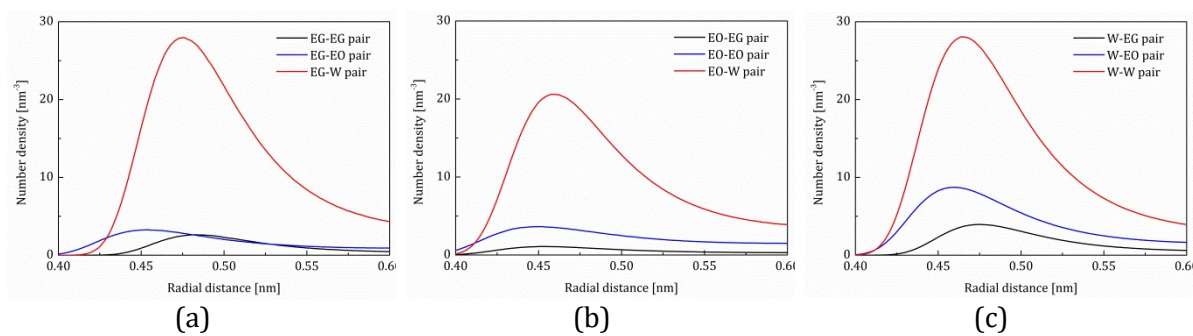

**Figure S3.** Radial distribution functions of the hydrophilic bead pairs in the emulsion system with 3% water in batch 1: (a) around EG; (b) around EO; (c) around W.

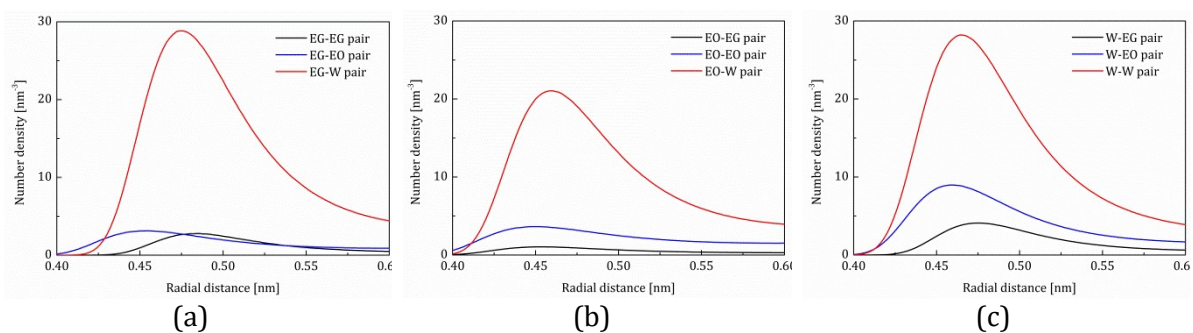

**Figure S4.** Radial distribution functions of the hydrophilic bead pairs in the emulsion system with 5% water in batch 1: (a) around EG; (b) around EO; (c) around W.
